# Supplementary material for: PAMAM–PMAA brush-functionalized magnetic composite nanospheres: a smart nanoprobe with tunable selectivity for effective enrichment of mono-, multi-, or global phosphopeptides
Source: Royal Society of Chemistry journal article supplement (doi:10.1039/c9tb02577d), 2020-01-01
Supplement: c9tb02577d1.pdf [file c9tb02577d1.pdf]

PAMAM-PMAA brushes-functionalized magnetic composite  
nanospheres: A smart nanoprobe with tunable selectivity for effective  
enrichment of mono-, multi-, or global phosphopeptides

Lingzhu Yu, Bin Luo, Zhiyu Li, Jia He and Fang Lan\*, Yao Wu\*

National Engineering Research Center for Biomaterials, Sichuan University, Chengdu, 610064

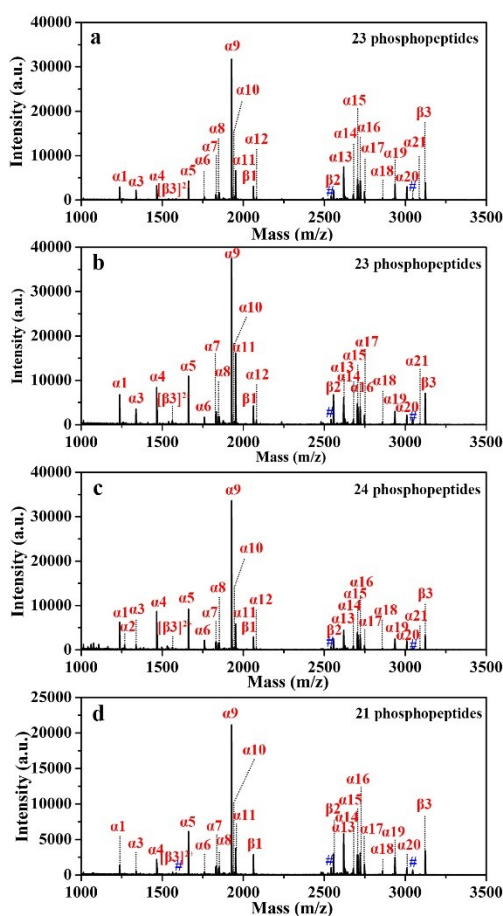

**Figure S1** MALDI-TOF mass spectra of  $\alpha$ -casein ( $10^{-6}$  M) after enrichment by  $\text{Fe}_3\text{O}_4@PDA@PMAA@PAMAM$  nanospheres with different PAMAM dendrimers amounts in 70% ACN- $\text{H}_2\text{O}$ , 0.1 M HAC: (a) 25  $\mu\text{L}$ , (b) 75  $\mu\text{L}$ , (c) 150  $\mu\text{L}$  and (d) 300  $\mu\text{L}$ . (#, dephosphorylated peptide)

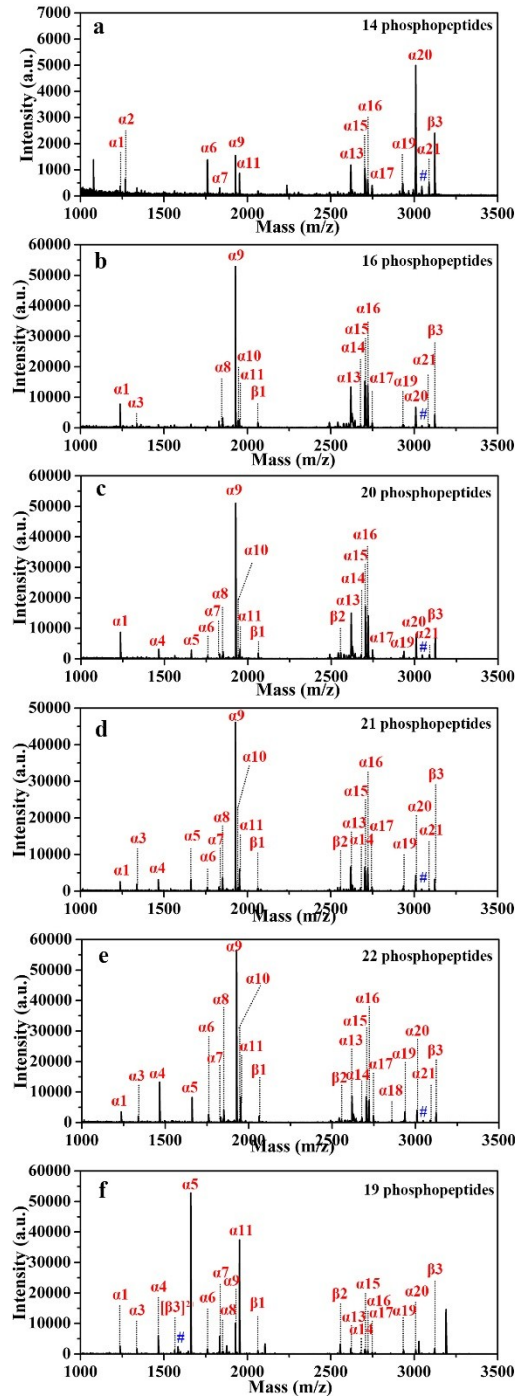

**Figure S2** MALDI-TOF mass spectra of  $\alpha$ -casein ( $10^{-6}$  M) after enrichment by  $\text{Fe}_3\text{O}_4@PDA@PMAA@PAMAM$  nanospheres with different loading buffer solution (a) 30% ACN- $\text{H}_2\text{O}$ , 0.1 M HAC, (b) 40% ACN- $\text{H}_2\text{O}$ , 0.1 M HAC, (c) 50% ACN- $\text{H}_2\text{O}$ , 0.1 M HAC, (d) 60% ACN- $\text{H}_2\text{O}$ , 0.1 M HAC, (e) 70% ACN- $\text{H}_2\text{O}$ , 0.1 M HAC and (f) 80% ACN- $\text{H}_2\text{O}$ , 0.1 M HAC. (#, dephosphorylated peptide)

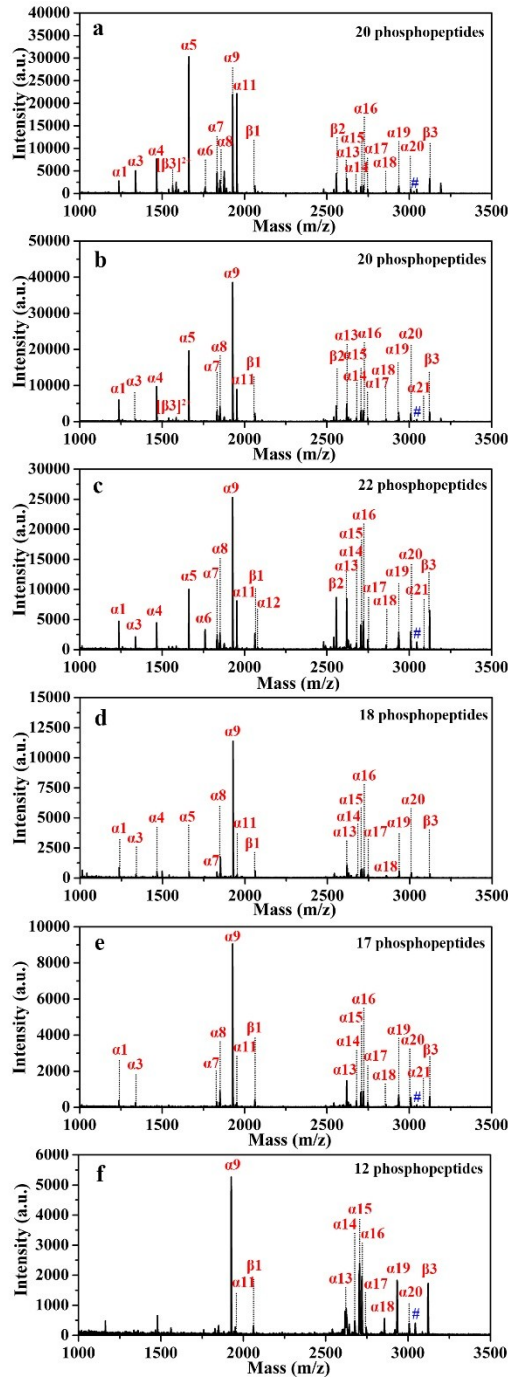

**Figure S3** MALDI-TOF mass spectra of  $\alpha$ -casein ( $10^{-6}$  M) after enrichment by  $\text{Fe}_3\text{O}_4@\text{PDA}@\text{PMAA}@\text{PAMAM}$  nanospheres with different loading buffer solution (a) 70% ACN- $\text{H}_2\text{O}$ , 0.01 M HAC, (b) 70% ACN- $\text{H}_2\text{O}$ , 0.05 M HAC, (c) 70% ACN- $\text{H}_2\text{O}$ , 0.1 M HAC, (d) 70% ACN- $\text{H}_2\text{O}$ , 0.2 M HAC, (e) 70% ACN- $\text{H}_2\text{O}$ , 0.4 M HAC and (f) 70% ACN- $\text{H}_2\text{O}$ , 0.8 M HAC. (#, dephosphorylated peptide)

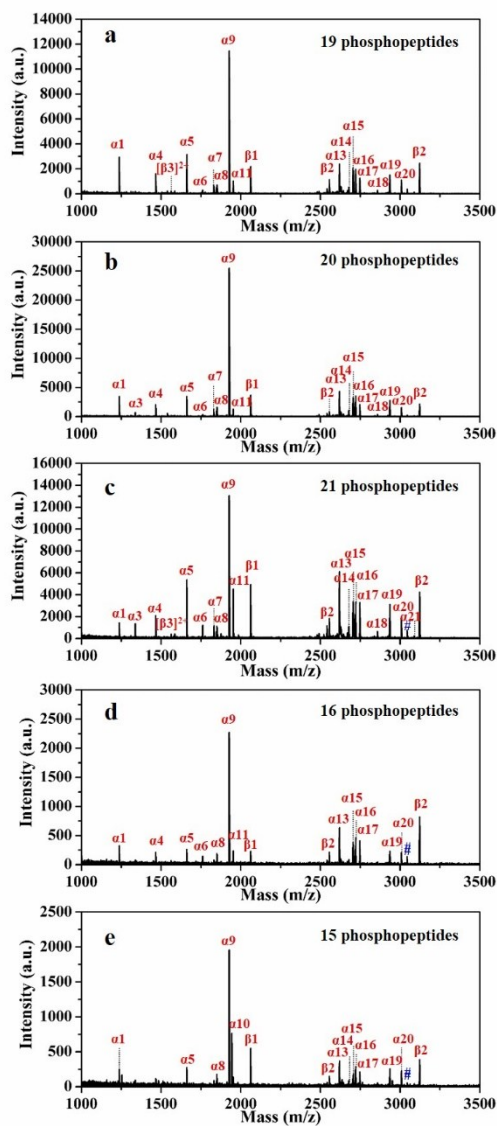

**Figure S4** MALDI-TOF mass spectra of  $\alpha$ -casein ( $10^{-6}$  M) after enrichment by  $\text{Fe}_3\text{O}_4\text{@PDA@PMAA@PAMAM}$  nanospheres with different elution buffer solution (a) 30% ACN- $\text{H}_2\text{O}$ , 2% TFA, (b) 40% ACN- $\text{H}_2\text{O}$ , 2% TFA, (c) 50% ACN- $\text{H}_2\text{O}$ , 2% TFA, (d) 60% ACN- $\text{H}_2\text{O}$ , 2% TFA and (e) 70% ACN- $\text{H}_2\text{O}$ , 2% TFA. (#, dephosphorylated peptide)

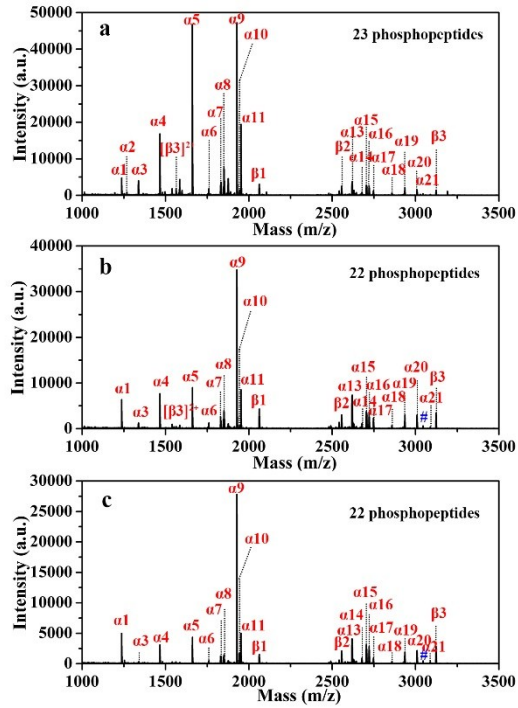

**Figure S5** MALDI-TOF mass spectra of  $\alpha$ -casein ( $10^{-6}$  M) after enrichment by  $\text{Fe}_3\text{O}_4@\text{PDA}@\text{PMAA}@\text{PAMAM}$  nanospheres with different elution buffer solution (a) 50% ACN- $\text{H}_2\text{O}$ , 2% TFA, (b) 50% ACN- $\text{H}_2\text{O}$ , 4% TFA and (c) 50% ACN- $\text{H}_2\text{O}$ , 6% TFA. (#, dephosphorylated peptide)

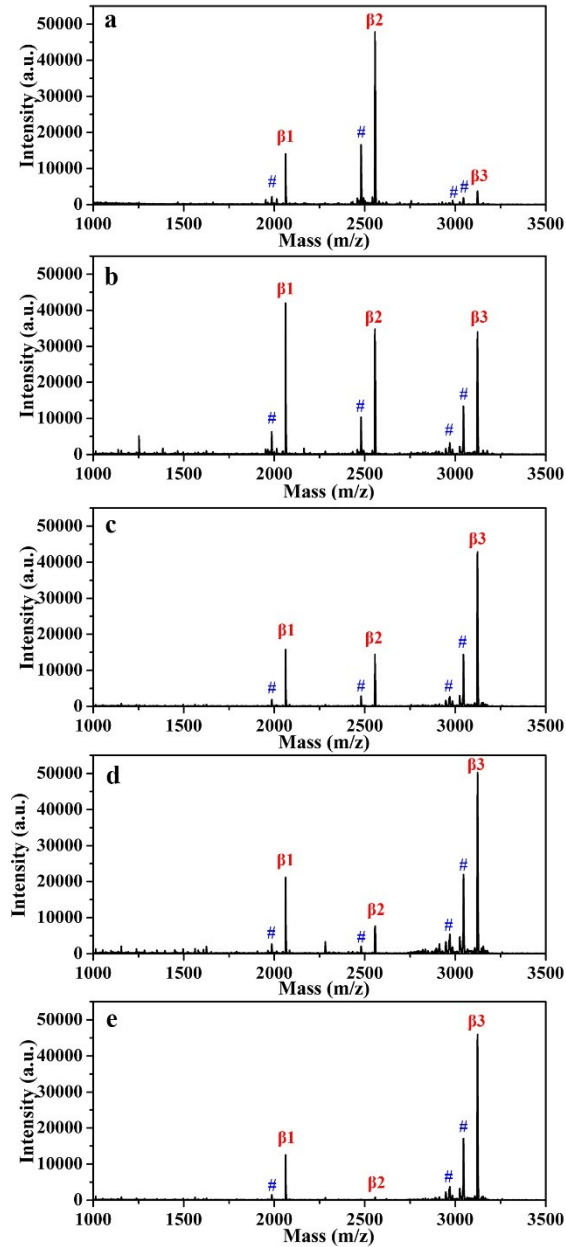

**Figure S6** MALDI mass spectra of  $\beta$ -casein digest ( $10^{-6}$  M) after enrichment by  $\text{Fe}_3\text{O}_4@\text{PDA}@\text{PMAA}@\text{PAMAM}$  nanospheres in 70% ACN- $\text{H}_2\text{O}$ , 0.1 M HAC. Cycling 1st (a), cycling 2nd (b), cycling 3rd (c), cycling 4th (d), and cycling 5th (e). (#, dephosphorylated peptide)

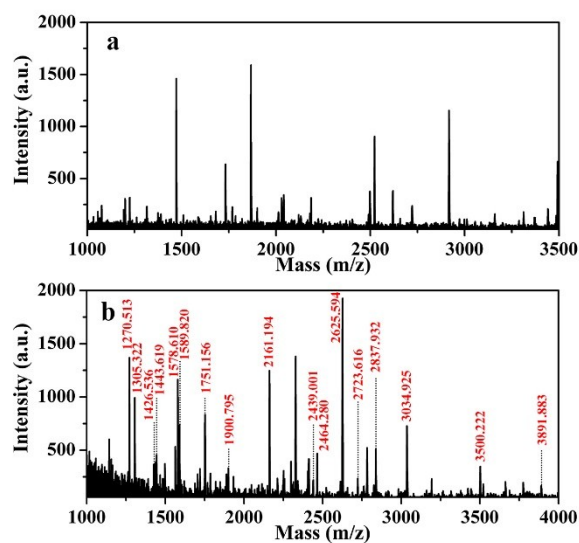

**Figure S7** MALDI-TOF mass spectra of non-digest human saliva (a) direct analysis and (b) after enrichment by  $\text{Fe}_3\text{O}_4@\text{PDA}@\text{PMAA}@\text{PAMAM}$  nanospheres in 70%  $\text{ACN-H}_2\text{O}$ , 0.1 M HAC.

**Table 1** Detail information of the observed phosphopeptides obtained from tryptic digest of  $\alpha$ -casein after enrichment by  $\text{Fe}_3\text{O}_4@\text{PDA}@\text{PMAA}@\text{PAMAM}$  nanospheres in MALDI-TOF MS analysis

| No.         | Observed m/z | Peptide sequence                    | Number of phosphoryl groups | Reported reference |
|-------------|--------------|-------------------------------------|-----------------------------|--------------------|
| $\alpha$ 1  | 1237.427     | TVDME[pS]TEVF                       | 1                           | 1, 2               |
| $\alpha$ 2  | 1267.628     | YLGYLEQLLR                          |                             | 5                  |
| $\alpha$ 3  | 1337.682     | HIQKEDV[pS]ER                       | 1                           | 1                  |
| $\alpha$ 4  | 1466.566     | TVDME[pS]TEVFIK                     | 1                           | 1, 2, 5, 6         |
| $\alpha$ 5  | 1660.767     | VPQLEIVPN[pS]AEER                   | 1                           | 1, 5, 6            |
| $\alpha$ 6  | 1759.906     | HQGLPQEVLNENLLR                     |                             | 5                  |
| $\alpha$ 7  | 1832.802     | YLGEYLIVPN[pS]AEER                  | 1                           | 1, 2, 6            |
| $\alpha$ 8  | 1847.647     | DIGSE[pS]TEDQAMEDIK                 | 1                           | 1, 2, 5, 6         |
| $\alpha$ 9  | 1927.631     | DIG[pS]E[pS]TEDQAMEDIK              | 2                           | 1, 2, 5, 6         |
| $\alpha$ 10 | 1943.589     | DIG[pS]E[pS]TEDQA[Mo]EDIK           | 2                           | 1, 2, 6            |
| $\alpha$ 11 | 1951.930     | YKVPQLEIVPN[pS]AEER                 | 1                           | 1, 2, 5, 6         |
| $\alpha$ 12 | 2080.000     | KYKVPQLEIVPN[pS]AEER                | 1                           | 2, 3, 6            |
| $\alpha$ 13 | 2618.850     | NTMEHV[pS][pS][pS]EESII[pS]QETYK    | 4                           | 1, 2               |
| $\alpha$ 14 | 2677.897     | VNEL[pS]KDIG[pS]E[pS]TEDQAMEDIK     | 3                           | 1, 2, 6            |
| $\alpha$ 15 | 2703.789     | QMEAE[pS]I[pS][pS][pS]EEIVPN[pS]VEA | 5                           | 1, 2, 6            |

|             |          |                                      |   |            |
|-------------|----------|--------------------------------------|---|------------|
| $\alpha$ 16 | 2720.900 | QMEAE[pS]I[pS][pS][pS]EEIVPNPN[pS]VE | 5 | 1, 2, 6    |
| $\alpha$ 17 | 2746.960 | NTMEHV[pS][pS][pS]EE[pS]IISQETYKQ    | 4 | 2, 6       |
| $\alpha$ 18 | 2857.324 | VNELSKDIG[pS]E[pS]TEDQAMEDIKQM       | 2 | 4, 6       |
| $\alpha$ 19 | 2935.087 | EKVNEL[pS]KDIG[pS]E[pS]TEDQAMEDI     | 3 | 1, 2, 6    |
| $\alpha$ 20 | 3007.954 | NANEEYSIG[pS][pS][pS]EE[pS]AEVATE    | 4 | 1, 2, 6    |
| $\alpha$ 21 | 3087.818 | NANEEY[PS]IG[PS][PS][PS]EE[PS]AEVA   | 5 | 2, 6       |
| $\beta$ 1   | 2061.780 | FQ[pS]EEQQQTEDELQDK                  | 1 | 1, 2, 6    |
| $\beta$ 2   | 2555.975 | FQ[pS]EEQQQTEDELQDKIHPF              | 1 | 1, 2       |
| $\beta$ 3   | 3122.138 | RELEELNVPGEIVE[pS]L[pS][pS][pS]EESI  | 4 | 1, 2, 5, 6 |

**Table 2** Detail information of the observed phosphopeptides from tryptic digest of proteins extracted from non-fat milk after enrichment by Fe<sub>3</sub>O<sub>4</sub>@PDA@PMAA@PAMAM nanospheres in MALDI-TOF MS analysis

| No. | Observed m/z | Peptide sequence                  | Number of phosphoryl groups | Reported reference |
|-----|--------------|-----------------------------------|-----------------------------|--------------------|
| 1   | 1121.519     | KEKVNEL[pS]KDIG[pS]E[pS]TEDQA     | 3                           | 1, 3               |
| 2   | 1237.660     | TVDME[pS]TEVF                     | 1                           | 1, 2               |
| 3   | 1252.759     | TVD[Mo]E[pS]TEVF                  | 1                           | 1, 2               |
| 4   | 1282.662     | KKIEKFQ[pS]EEQQQTEDELQDKIHPFAQ    | 1                           | 3                  |
| 5   | 1454.696     | LSKDIG[pS]E[pS]TEDQA              | 2                           | 3, 4               |
| 6   | 1494.724     | RFFVAPFPEVFGKEKVNELSKDIG[pS]E[pS] | 2                           | 4                  |
| 7   | 1660.571     | VPQLEIVPN[pS]AEER                 | 1                           | 1, 2, 3, 5, 6      |
| 8   | 1760.139     | HQGLPQEVLNENLLR                   |                             | 5                  |
| 9   | 1847.742     | DIGSE[pS]TEDQAMEDIK               | 1                           | 1, 2, 5, 6         |
| 10  | 1926.350     | DIG[pS]E[pS]TEDQAMEDIK            | 2                           | 1, 2, 3, 5, 6      |
| 11  | 1981.787     | NMAINP[pS]KENLCSTFCK              | 1                           | 2, 6               |
| 12  | 2060.446     | FQ[pS]EEQQQTEDELQDK               | 1                           | 1, 2, 3, 6         |
| 13  | 2351.396     | NVPGEIVESL[pS][pS][pS]EE[pS]ITR   | 4                           | 2                  |
| 14  | 2422.602     | KYKVPQLEIVPN [pS]AEERLHSMK        | 1                           | 4                  |
| 15  | 2554.502     | FQ[pS]EEQQQTEDELQDKIHPF           | 1                           | 1, 2, 3, 5         |
| 16  | 2807.452     | KVNEL[pS]KDIG[pS]E[pS]TEDQAMEDIK  | 3                           | 1                  |
| 17  | 2865.600     | KVNELSKDIG[pS]E[pS]TEDQAMEDIKQ    | 2                           | 5                  |



|    |          |                                     |   |               |
|----|----------|-------------------------------------|---|---------------|
| 18 | 2933.641 | EKVNEL[pS]KDIG[pS]E[pS]TEDQAMEDI    | 3 | 1, 2, 6       |
| 19 | 2950.581 | KEKVNEL[pS]KDIG[pS]E[pS]TEDQA[Mo]   | 3 | 2             |
| 20 | 2963.424 | ELEELNVPGEIVE[pS]L[pS][pS]EESIT     | 4 | 1, 2, 3, 5    |
| 21 | 3022.490 | RELEELNVPGEIVESL[pS] [pS]           | 2 | 6             |
| 22 | 3120.430 | RELEELNVPGEIVE[pS]L[pS][pS][pS]EESI | 4 | 1, 2, 3, 5, 6 |

**Table 3** Enrichment performance of different materials to endogenous phosphopeptides from human saliva

| Number | Type of materials                                                                     | The number of identified phosphopeptides | Reference |
|--------|---------------------------------------------------------------------------------------|------------------------------------------|-----------|
| 1      | TiO <sub>2</sub> -NH <sub>2</sub>                                                     | 11                                       | 7         |
| 2      | magG@PDA-Sn <sup>4+</sup>                                                             | 20                                       | 8         |
| 3      | Ti <sup>4+</sup> -MGMSs                                                               | 14                                       | 9         |
| 4      | MG@ mSiO <sub>2</sub> -ATP-Ti <sup>4+</sup>                                           | 19                                       | 10        |
| 5      | Fe <sub>3</sub> O <sub>4</sub> MNCs                                                   | 11                                       | 11        |
| 6      | MNPs-(POM <sub>4</sub> /CYECS <sub>4</sub> )                                          | 16                                       | 12        |
| 7      | Fe <sub>3</sub> O <sub>4</sub> -LDH <sub>2</sub>                                      | 9                                        | 13        |
| 8      | Fe <sub>3</sub> O <sub>4</sub> @TiO <sub>2</sub> -ZrO <sub>2</sub> @mSiO <sub>2</sub> | 14                                       | 14        |
| 9      | 2-D Hf-BTB                                                                            | 17                                       | 15        |
| 10     | Fe <sub>3</sub> O <sub>4</sub> @PDA@PMAA@PAMAM                                        | 17                                       | This work |

## References

1. Z. C. Xiong, Y. J. Chen, L. Y. Zhang, J. Ren, Q. Q. Zhang, M. L. Ye, W. B. Zhang and H. H. Zou, *ACS Appl. Mater. Interfaces.*, 2014, **6**, 22743.
2. Y. Y. Hong, C. L. Pu, H. L. Zhao, Q. Y. Sheng, Q. L. Zhan and M. B. Lan, *Nanoscale*, 2017, **9**, 16764.
3. B. Luo, M. G. Yang, P. P. Jiang, F. Lan and Y. Wu, *Nanoscale*, 2018, **10**, 8391.
4. R. X. Su, W. Qi, Z. M. He, S. X. Yuan and Y. B. Zhang, *Food Chemistry*, 2007, **104**, 276.
5. M. Najam-ul-Haq, A. Saeed, F. Jabeen, F. Maya, M. N. Ashiq, and A. Sharif, *ACS Appl. Mater. Interfaces.*, 2014, **6**, 3536.
6. Y. Güzel, M. Rainer, C. B. Messner, S. Hussain, F. Meischl, M. Sasse, R. Tessadri, G. K. Bonn, *J. Sep. Sci.*, 2015, **38**, 1334.

7. H. Z. Lin, K. P. Yuan, C. H. Deng, *Talanta*, 2017, **175**, 427.
8. H. Z. Lin and C. H. Deng, *Proteomics*, 2016, **16**, 2733.
9. N. R. Sun, C. H. Deng, Y. Li and X. M. Zhang, *ACS Appl. Mater. Interfaces*, 2014, **6**, 11799.
10. J. Su, X. W. He, L. X. Chen and Y. K. Zhang, *ACS Sustainable Chem. Eng.*, 2018, **6**, 2188.
11. X. Y. Long, J. Y. Li, D. Sheng and H. Z. Lian, *RSC advances*, 2016, **6**, 96210.
12. D. D. Jiang, Z. Li and Q. Jia, *Anal. Chim. Acta*, 2019, **1066**, 58.
13. D. D. Jiang, X. Q. Li and Q. Jia, *ACS Sustainable Chem. Eng.*, 2019, **7**, 421.
14. Y. L. Li, L. L. Liu, H. Wu and C. H. Deng, *Anal. Chim. Acta*, 2019, **1079**, 111.
15. J. Xiao, S. S. Yang, J. X. Wu, H. Wang, X. Z. Yu, W. B. Shang, G. Q. Chen and Z. Y. Gu, *Anal. Chem.*, 2019, **91**, 9093.
